# Supplementary material
Source: PubMed Central journal article supplement (PMC6086982)
Supplement: BPH-175-3504-s001.pdf [file BPH-175-3504-s001.pdf]

## **Supplementary Information**

### **Drug resistance profiles of mutations in the RET kinase domain**

Xuan Liu<sup>1,2,#</sup>, Tao Shen<sup>1,2,#</sup>, Blaine H. M. Mooers<sup>1,3</sup>, Frank Hilberg<sup>4</sup>, and Jie Wu<sup>1,2</sup>

<sup>1</sup>Peggy and Charles Stephenson Cancer Center, University of Oklahoma Health Sciences Center, Oklahoma City, Oklahoma;

<sup>2</sup>Department of Pathology, University of Oklahoma Health Sciences Center, Oklahoma City, Oklahoma;

<sup>3</sup>Department of Biochemistry and Molecular Biology, University of Oklahoma Health Sciences Center, Oklahoma City, Oklahoma;

<sup>4</sup>Department of Pharmacology, Boehringer Ingelheim RCV GmbH & Co KG, Vienna, Austria

#Equal contributing authors.

Correspondence: [jie-wu@ouhsc.edu](mailto:jie-wu@ouhsc.edu)

#### **List of supplementary information:**

1. Supplementary figure legends.
2. Supplementary Table 1.
3. Supplementary figures 1-5.

## Supplementary figure legends

### Figure s1

Comparison of RET mutants expressed in stable BaF3 derived cell lines. Cell lysates of indicated cell lines were prepared and equal amounts of protein were analyzed by immunoblotting with antibodies to the Flag-tag or actin.

### Figure s2

Comparison of sensitivities to vandetanib between BaF3/RET(G810S) and two vandetanib-resistant BaF3/RET(G810S/G949R) cell lines. Experiments were performed as described in the Methods section of the main text.

### Figure s3

Comparison of inhibiting RET, RET(V804L), and RET(V804M) kinase activity by nintedanib *in vitro*. The *in vitro* kinase assay was performed as a commercial service by Reaction Biology (Malvern, PA) in parallel 10-dose IC50 singlet assay, with 3-fold serial dilution starting at 10  $\mu$ M. Curve fitting was as described (Scott et al., 2011).

### Figure s4

Immunoblot analysis of pRET in BaF3/KR, BaF3/KR(V871I), and BaF3/KR(F998V) cells after TKI treatment. (A) BaF3/KR and BaF3/KR(V871I) cells were treated with cabozantinib, lenvatinib, or vandetanib at the indicated concentrations for 4 h. Cleared cell lysates were analyzed by immunoblotting with indicated antibodies. (B) BaF3/KR and BaF3/KR(F998V) cells were treated and analyzed as in (A).

**Figure s5**

Inhibition of KR and KR(M918T) kinase activities in BaF3/KR and BaF3/KR(M918T) cells by cabozantinib, lenvatinib, vandetanib, and nintedanib. Cells were treated with 0, 0.1, or 0.25  $\mu$ M of each TKI for 4 h (A) or with the indicated concentration of vandetanib for 4 h (B). Cell lysates were analyzed by immunoblotting with antibodies to pRET or flag-tag.

Supplementary Table 1

KIF5B-RET mutations in nintedanib-resistant cell lines derived from BaF3/KR cells\*

| [Nintedanib] ( $\mu\text{M}$ ) | Cell line and mutation |       |       |       |       |       |             |             |             |     |
|--------------------------------|------------------------|-------|-------|-------|-------|-------|-------------|-------------|-------------|-----|
|                                | 1                      | 2     | 3     | 4     | 5     | 6     | 7           | 8           | 9           | 10  |
| 0.2                            | /                      | /     | /     | /     | /     | /     | /           | /           | /           | /   |
| 0.4                            | nm                     | nm    | nm    | nm    | nm    | nm    | nm          | nm          | nm          | die |
| 0.8                            | L730V                  | L730V | L730V | L730V | L730V | L730V | /           | /           | /           |     |
| 1.6                            | /                      | L730V | /     | die   | /     | /     | L730V/V804M | L730V       | L730V       |     |
| 2.4                            | /                      | die   | /     |       | die   | die   | L730V/V804M | L730V/V804M | L730V/V804M |     |
| 3.2                            | die                    | die   | die   |       |       |       | L730V/V804M | L730V/V804M | /           |     |

\*/, DNA not analyzed; nm, no mutation found

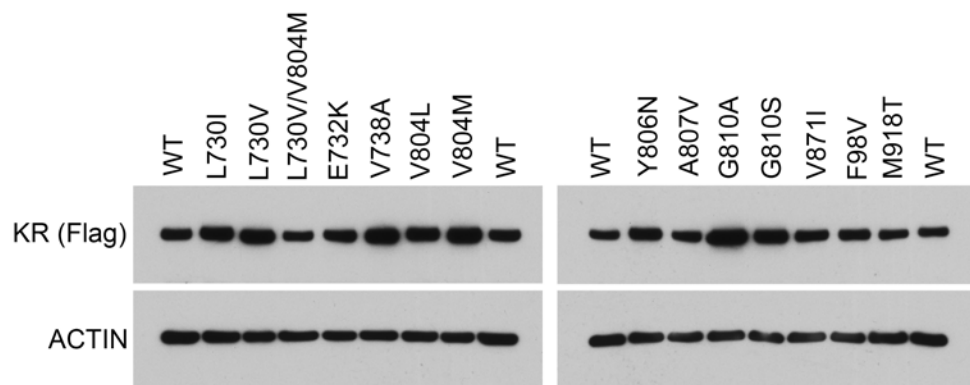

Fig. s1

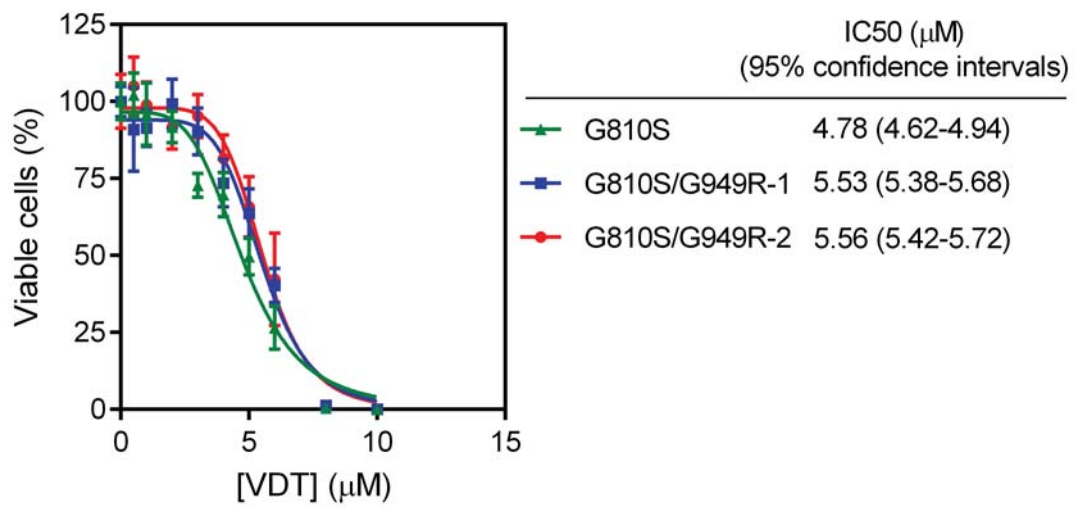

Fig. s2

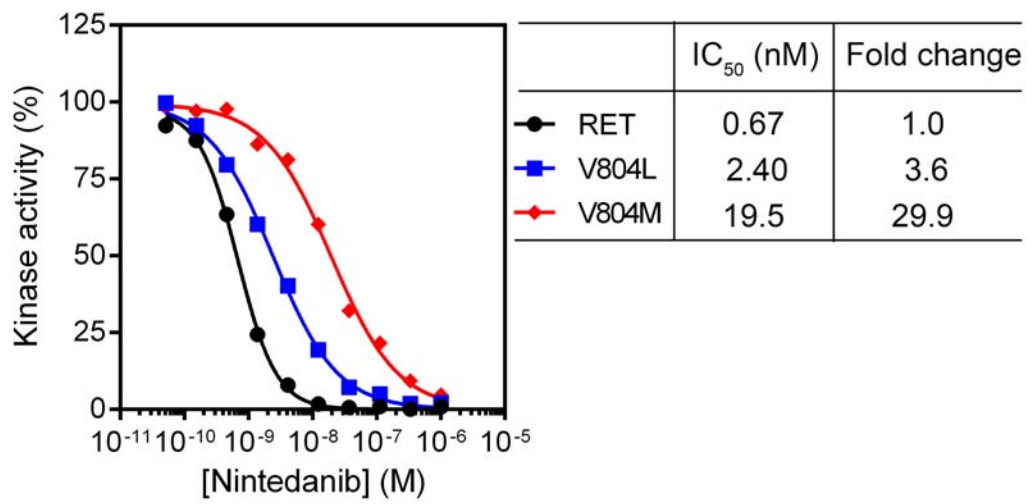

Fig. s3

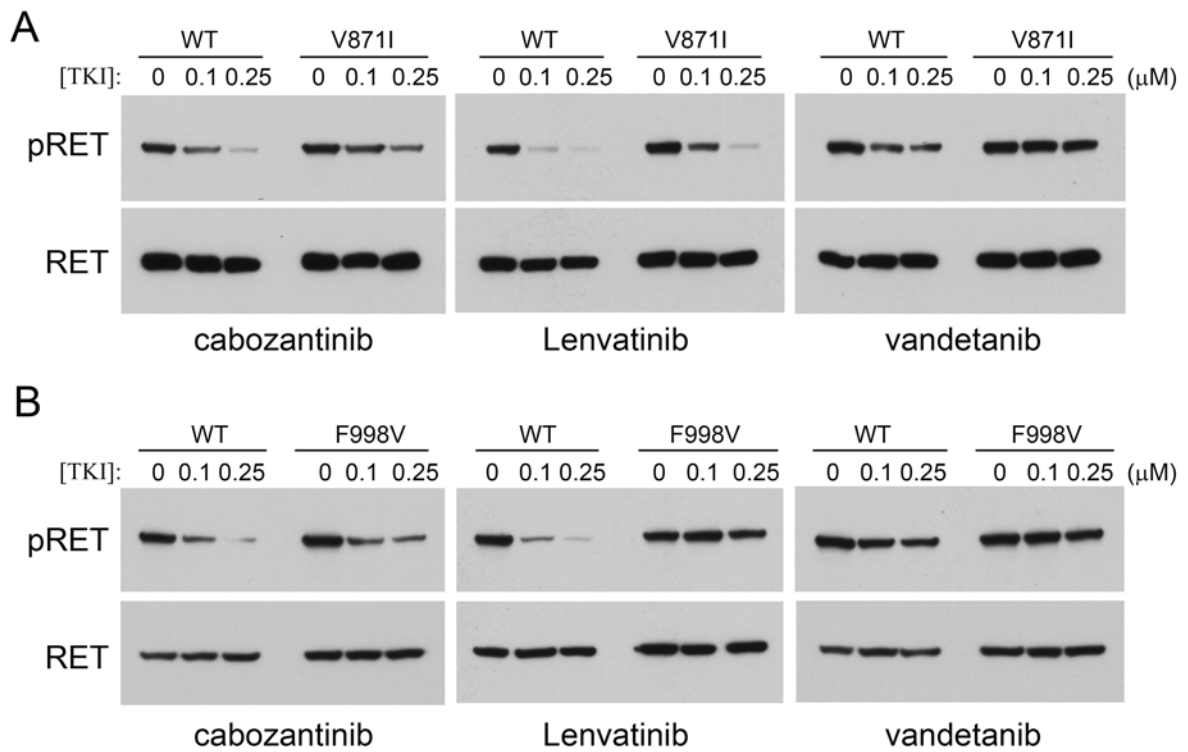

Fig. s4



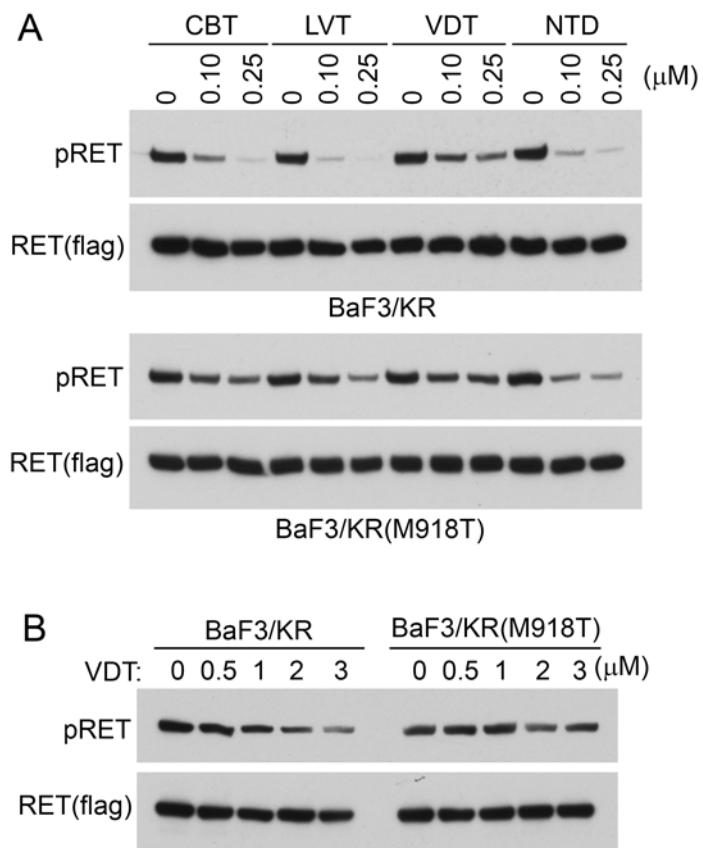

Fig. s5
